# Supplementary material for: (Phospho)proteomic Profiling of Microsatellite Unstable CRC Cells Reveals Alterations in Nuclear Signaling and Cholesterol Metabolism Caused by Frameshift Mutation of NMD Regulator UPF3A
Source: MDPI journal article supplement (doi:10.3390/ijms21155234), 2020-07-23
Supplement: s1 [file s1]

# Suppl. Figure S3

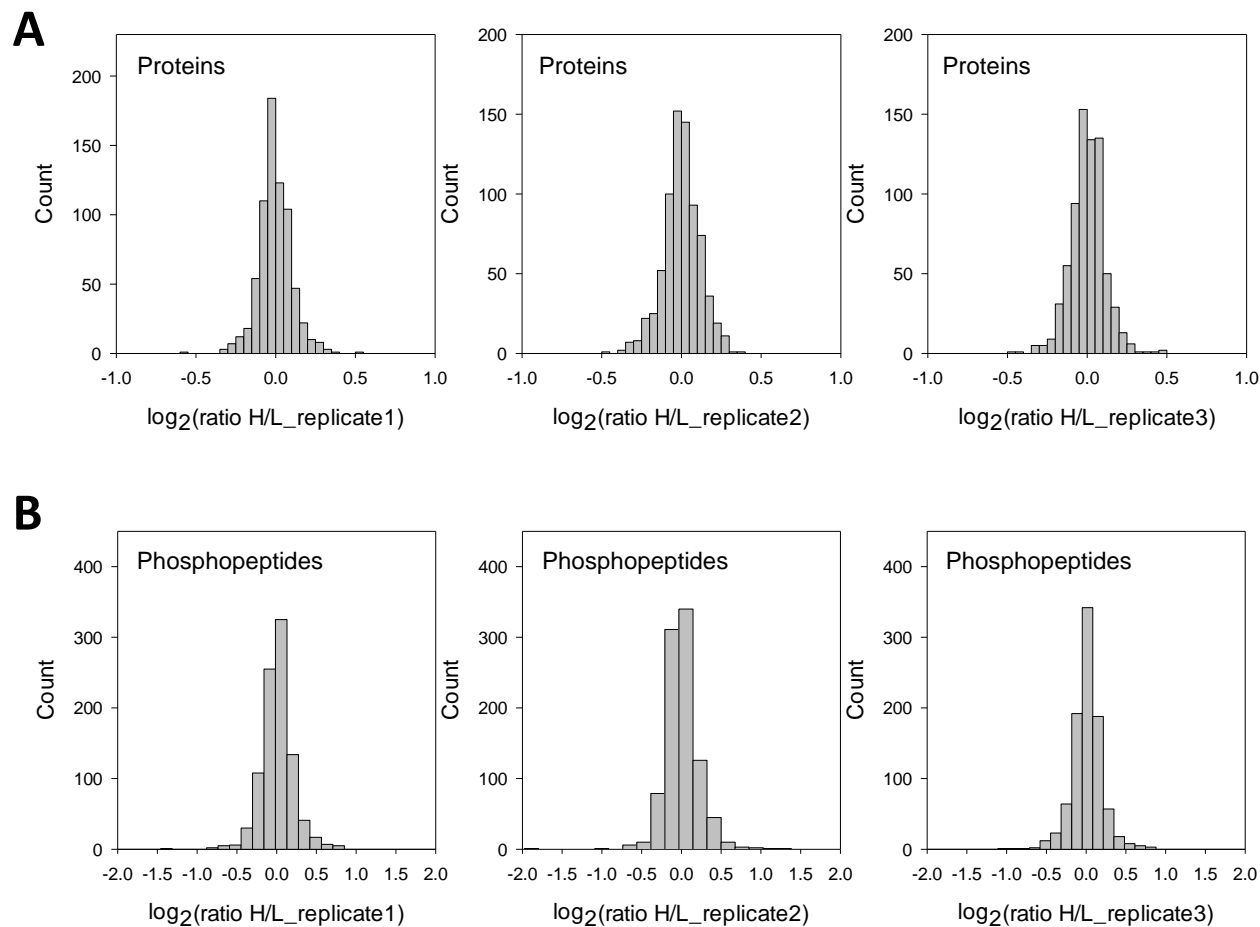

**Suppl. Figure S3. Comparison of SILAC-based quantifications between biological replicates.** (A) 1298 proteins were identified with at least 2 unique peptides and quantified in at least 2 biological replicates. Histogram of each replicate is shown. (B) 2248 phosphosites were identified with high confidence and quantified in at least 2 biological replicates. Histogram of each replicate is shown.
