# Supplementary material for: (Phospho)proteomic Profiling of Microsatellite Unstable CRC Cells Reveals Alterations in Nuclear Signaling and Cholesterol Metabolism Caused by Frameshift Mutation of NMD Regulator UPF3A
Source: MDPI journal article supplement (doi:10.3390/ijms21155234), 2020-07-23
Supplement: s1 [file s1]

Suppl. Figure S3

A

CTNND1  
S349  
Ratio pUPF3A/dUPF3A = 2.43\*

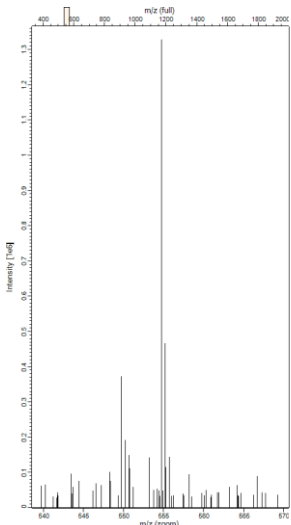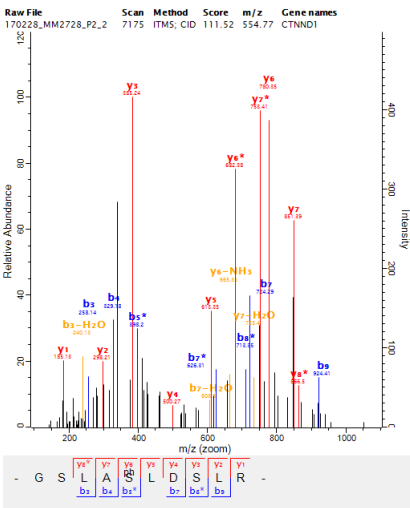

B

CTNND1  
S349, S352  
Ratio pUPF3A/dUPF3A = -1.41\*

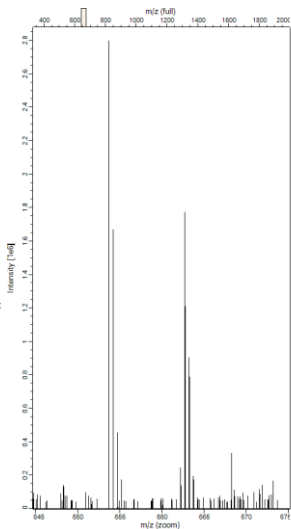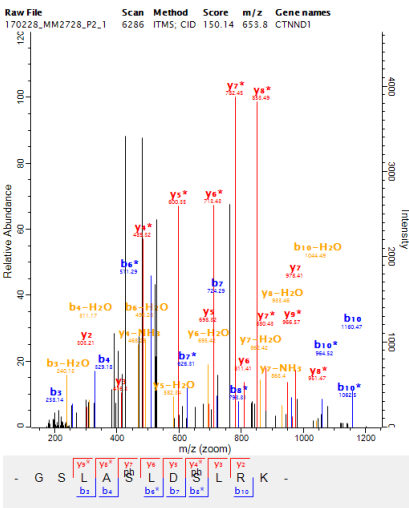

C

CTNND1  
S346, S349, S352  
Ratio pUPF3A/dUPF3A = -3.45\*

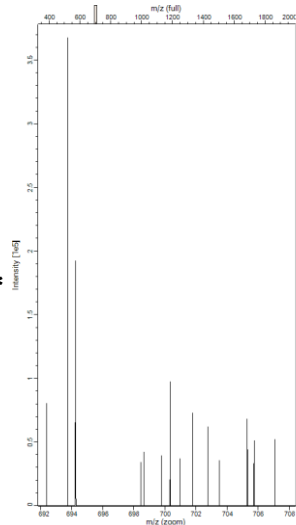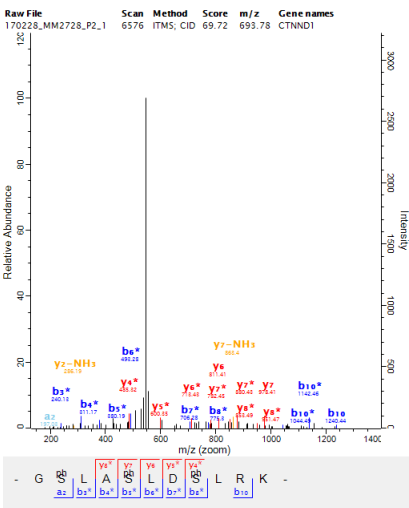

Suppl. Figure S4. Exemplary MS1 and MS2 spectra of both mono and multiply CTNND1 phosphosylated peptides with contrary regulation. (A) Mono hyperphosphorylated peptide at S349. (B) Doubly phosphorylated peptide at sites S349 and S352. (C) Triply hypophosphorylated peptide at sites S346, S349 and S352.

\*Mean ratio from three biological replicates. Ratio not corrected for protein expression
