# Supplementary material for: (Phospho)proteomic Profiling of Microsatellite Unstable CRC Cells Reveals Alterations in Nuclear Signaling and Cholesterol Metabolism Caused by Frameshift Mutation of NMD Regulator UPF3A
Source: MDPI journal article supplement (doi:10.3390/ijms21155234), 2020-07-23
Supplement: s1 [file s1]

## Suppl. Figure S1

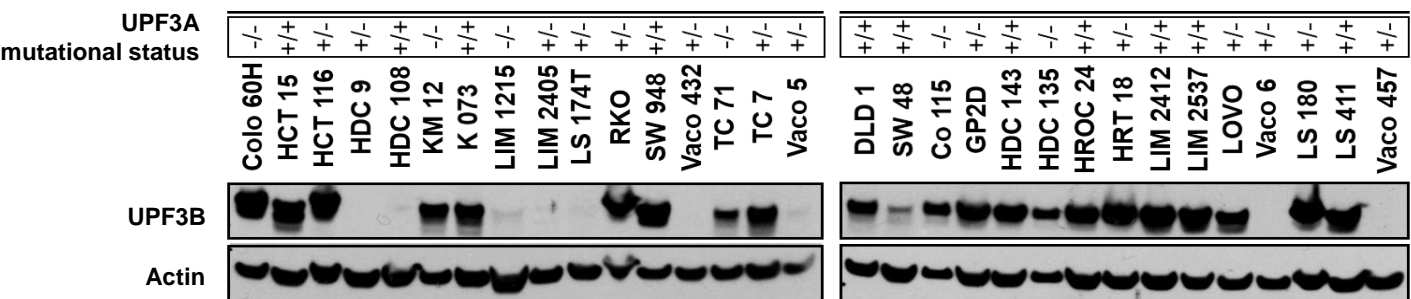

**Suppl. Figure S1. Expression of UPF3B in colorectal cancer cell lines.** Western Blot analysis of UPF3B protein expression in colorectal cancer cell lines in regard to mutational status of UPF3A alleles. SW948 cells (MSS) served as *UPF3A*<sup>+/+</sup> control while  $\beta$ -actin was used as loading control.
